# Supplementary material for: Effects of eicosapentaenoic acid and docosahexaenoic acidversusα-linolenic acid supplementation on cardiometabolic risk factors: a meta-analysis of randomized controlled trials
Source: Royal Society of Chemistry journal article supplement (doi:10.1039/c9fo03052b), 2020-01-01
Supplement: c9fo03052b1.pdf [file c9fo03052b1.pdf]

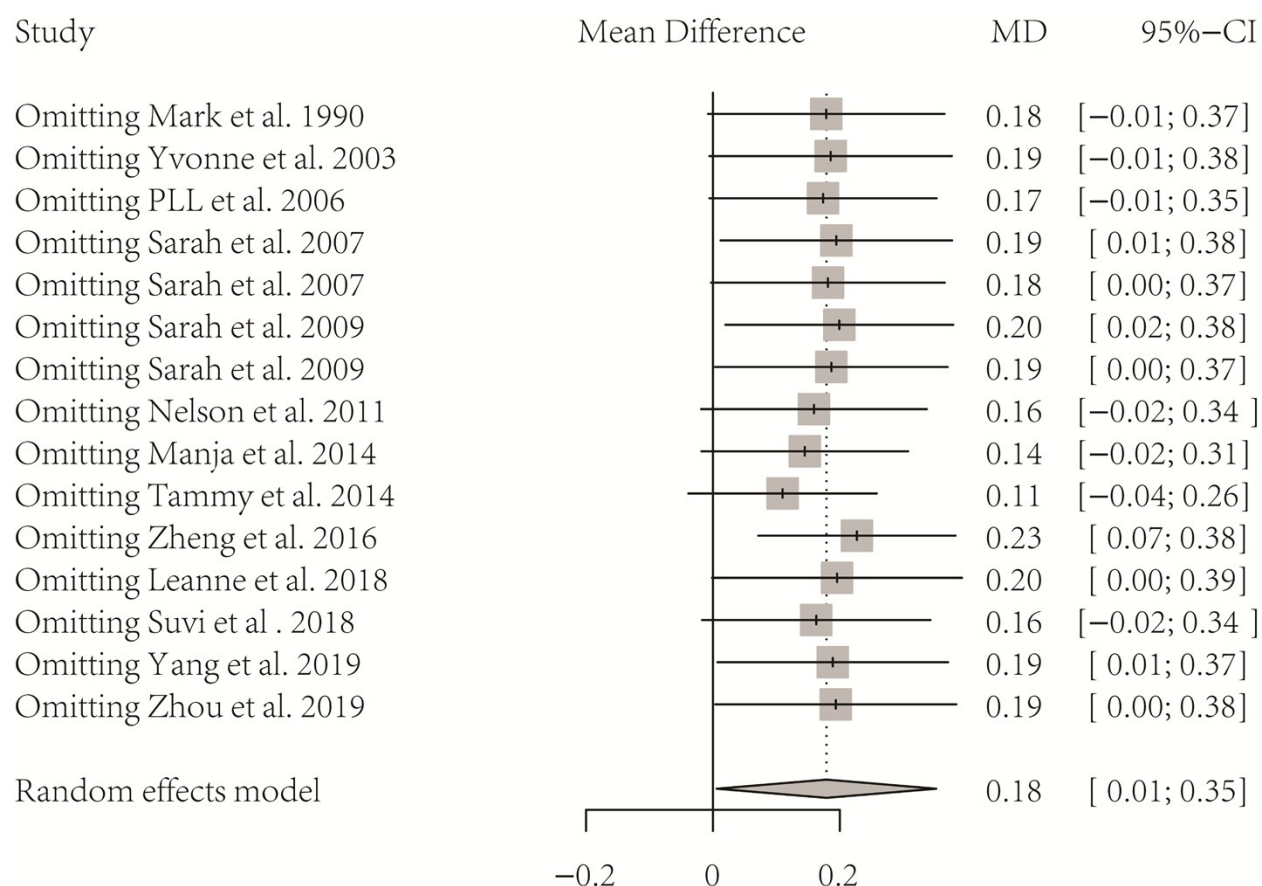

**Fig. S1 Sensitivity analysis of 15 studies evaluating TC. TC, total cholesterol.**

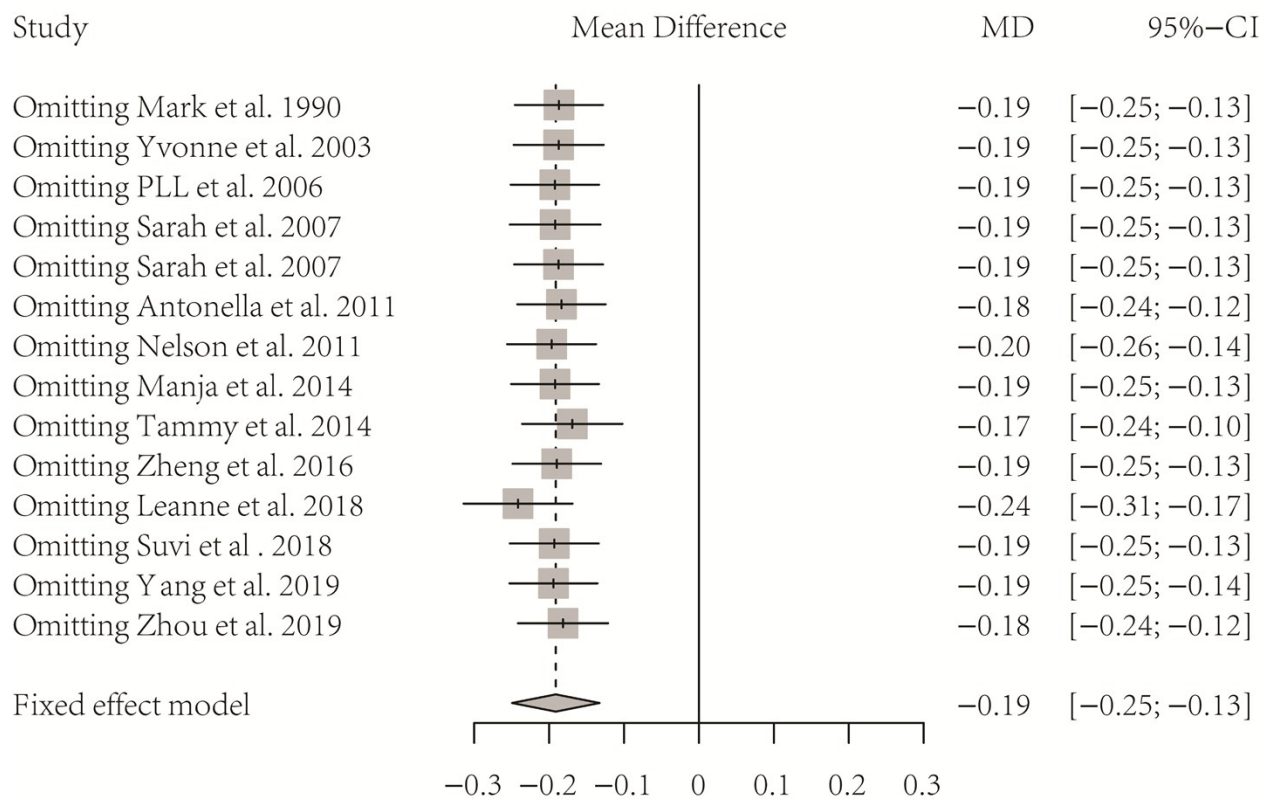

**Fig. S2 Sensitivity analysis of 14 studies evaluating TG. TG, triglycerides.**

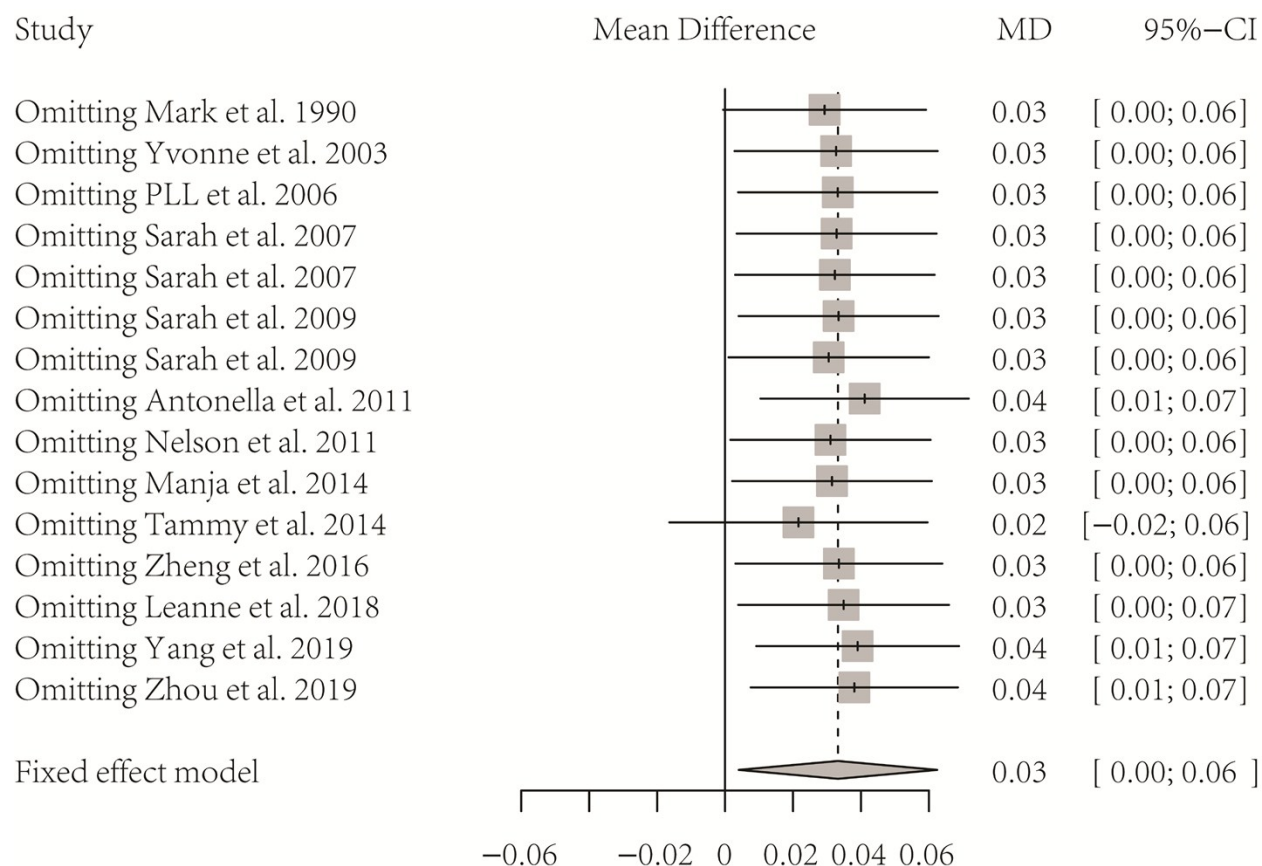

**Fig S3 Sensitivity analysis of 15 studies evaluating HDL. HDL, high-density lipoprotein.**

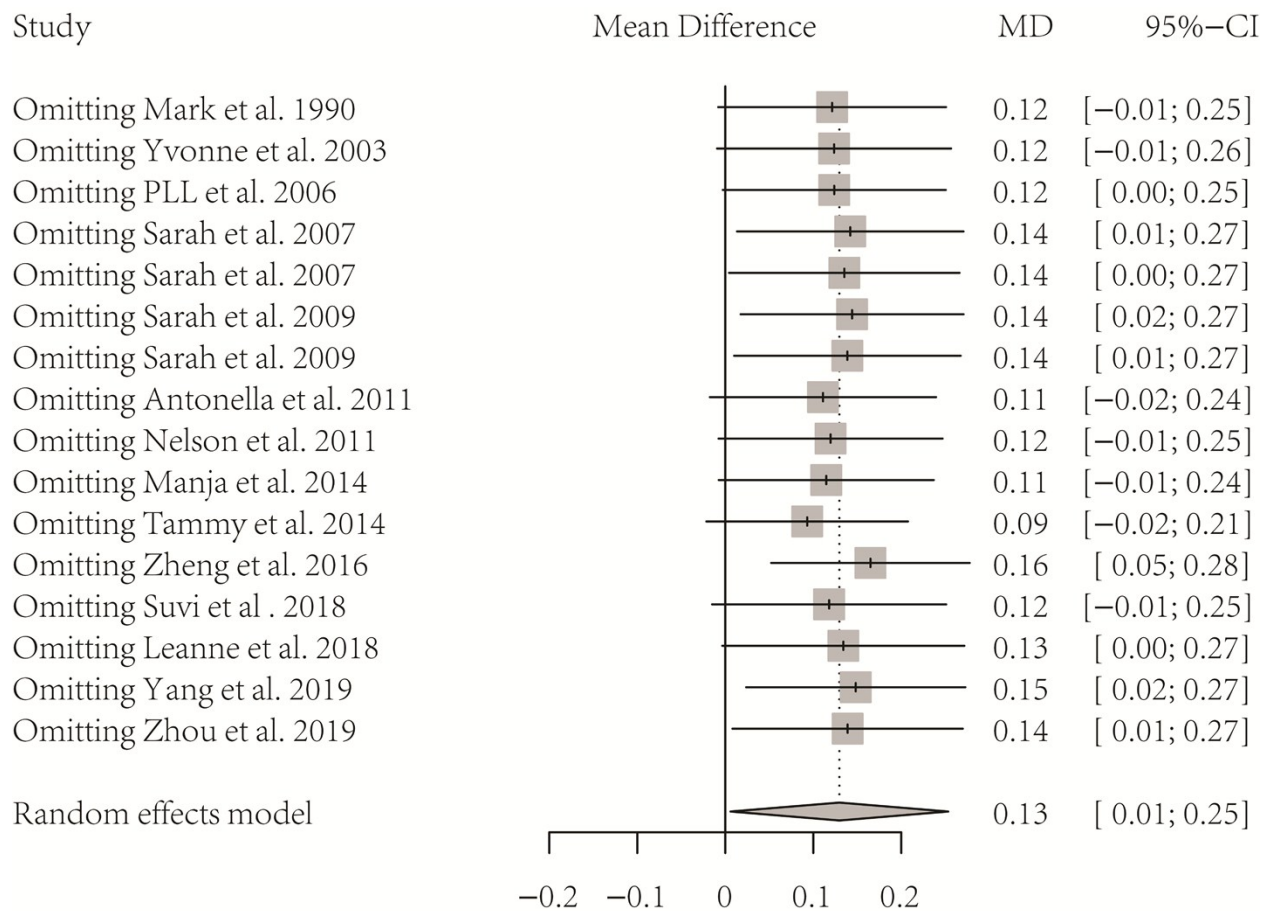

**Fig. S4 Sensitivity analysis of 16 studies evaluating LDL. LDL, low-density lipoprotein.**

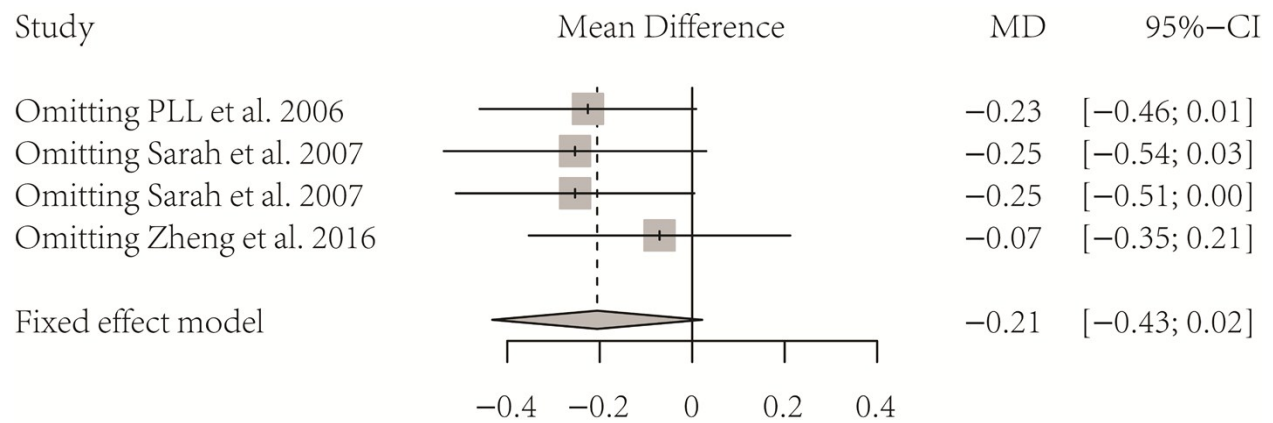

**Fig. S5 Sensitivity analysis of 4 studies evaluating TC: HDL. TC, total cholesterol; HDL, high-density lipoprotein.**

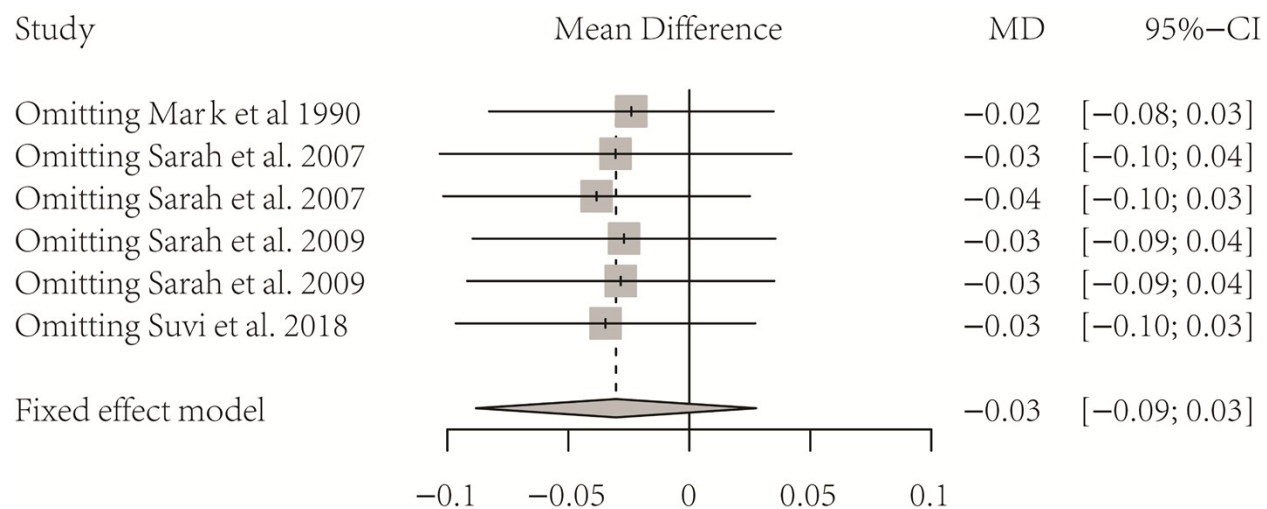

**Fig. S6 Sensitivity analysis of 6 studies evaluating VLDL. VLDL, very low-density lipoproteins.**

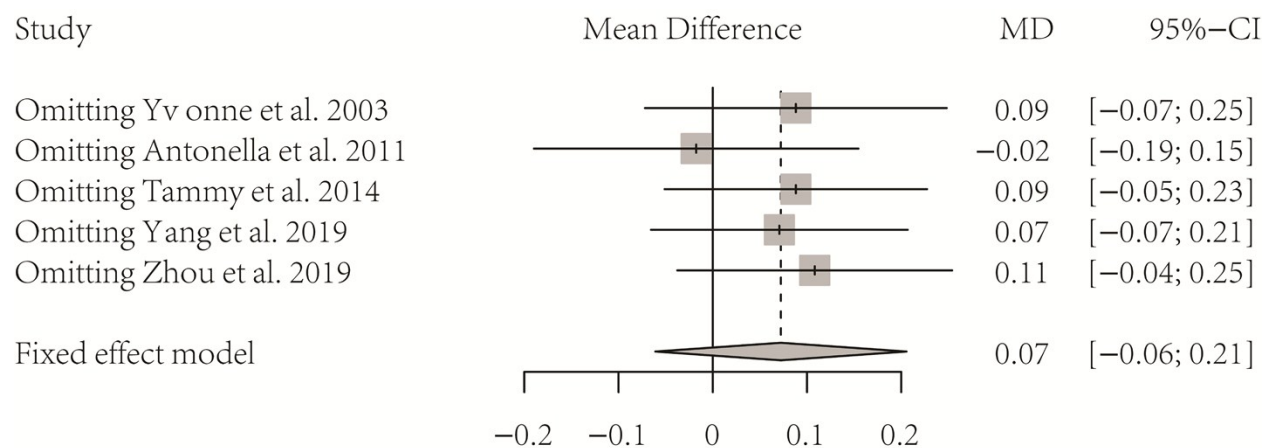

**Fig. S7 Sensitivity analysis of 5 studies evaluating glucose.**

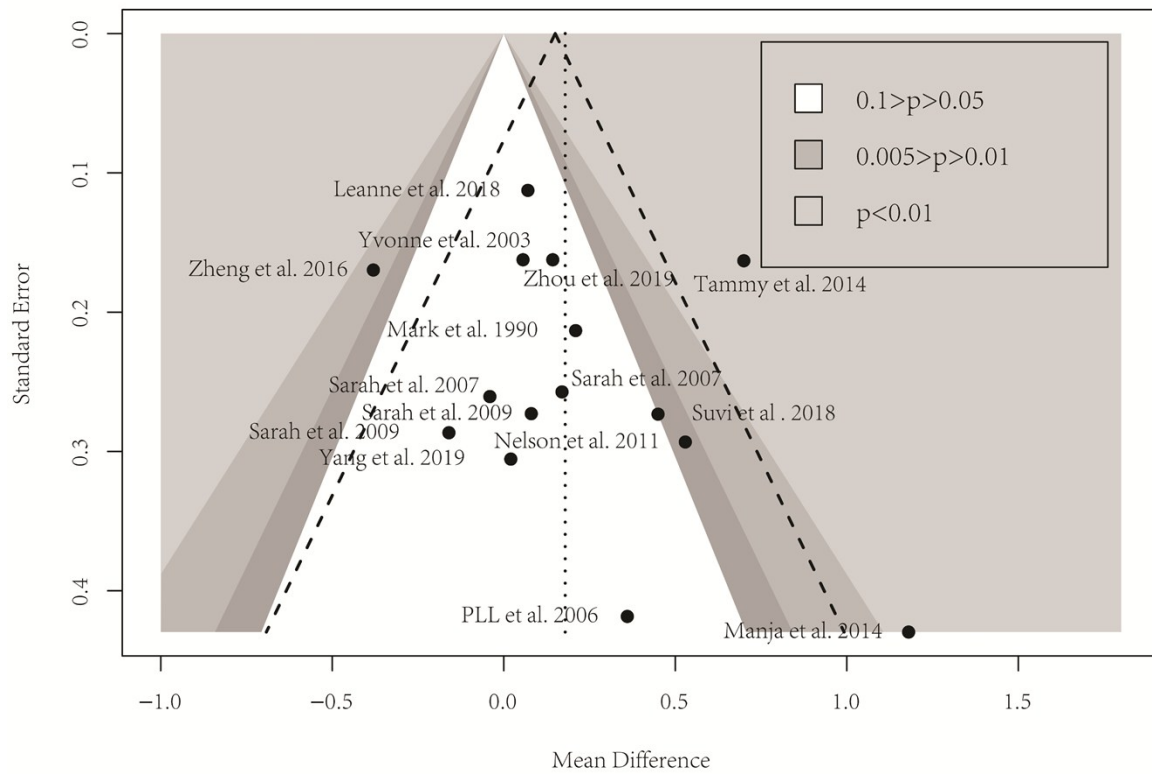

**Fig. S8 Contour-enhanced funnel plots with pseudo 95% confidence limits for publication bias on TC. TC, total cholesterol.**



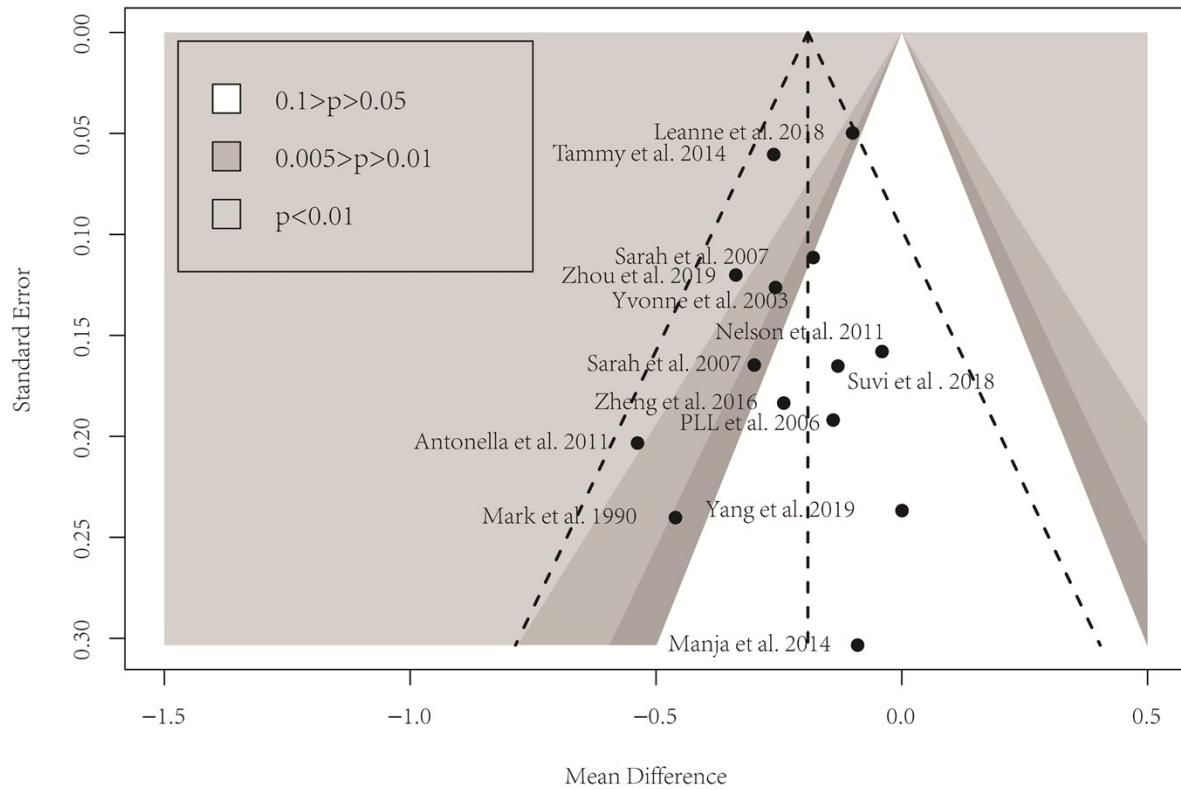

**Fig. S9 Contour-enhanced funnel plots with pseudo 95% confidence limits for publication bias on TG. TG, triglycerides.**

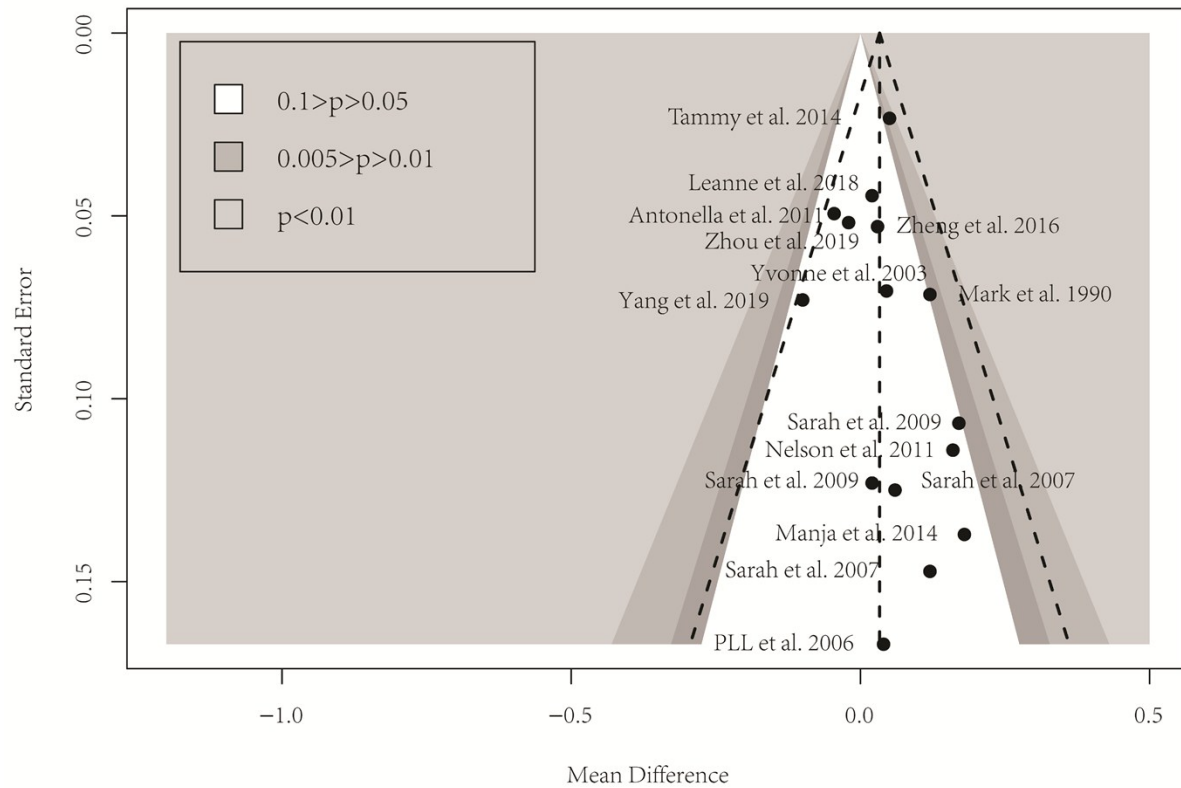

**Fig. S10 Contour-enhanced funnel plots with pseudo 95% confidence limits for publication bias on HDL. HDL, high-density lipoprotein.**

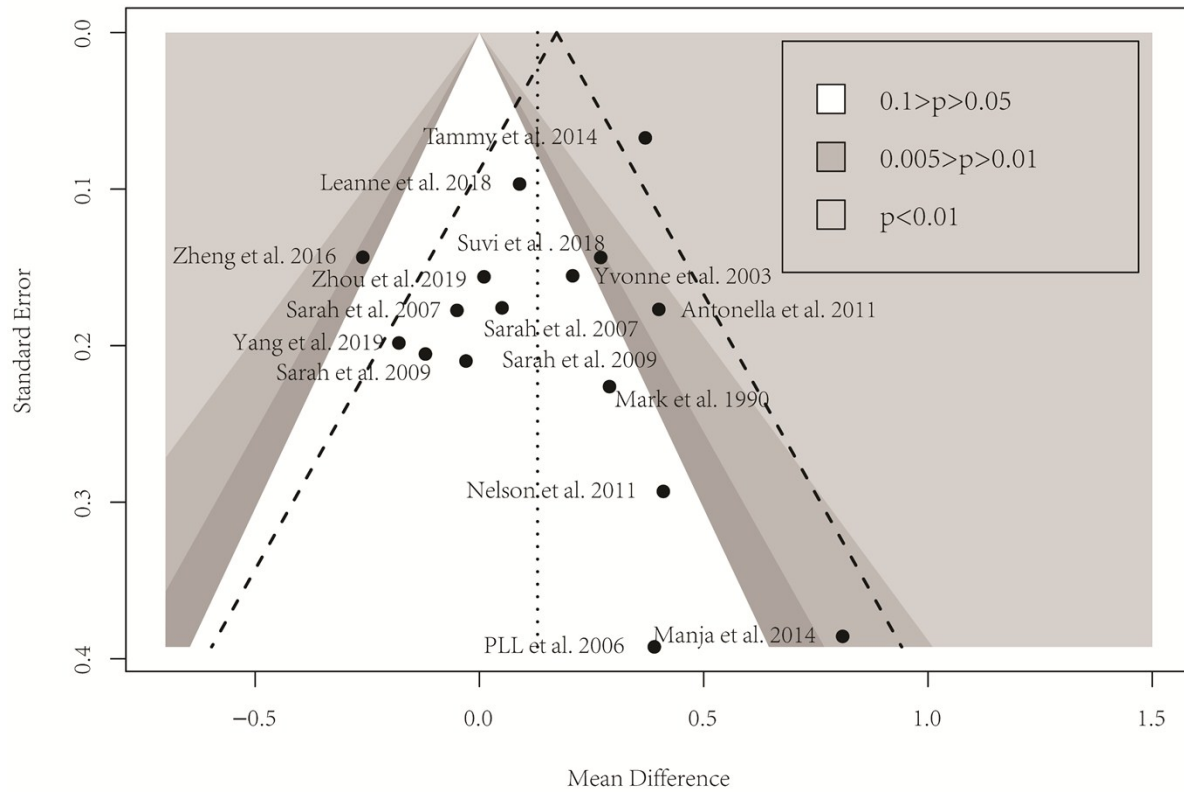

**Fig. S11 Contour-enhanced funnel plots with pseudo 95% confidence limits for publication bias on LDL. LDL, low-density lipoprotein.**

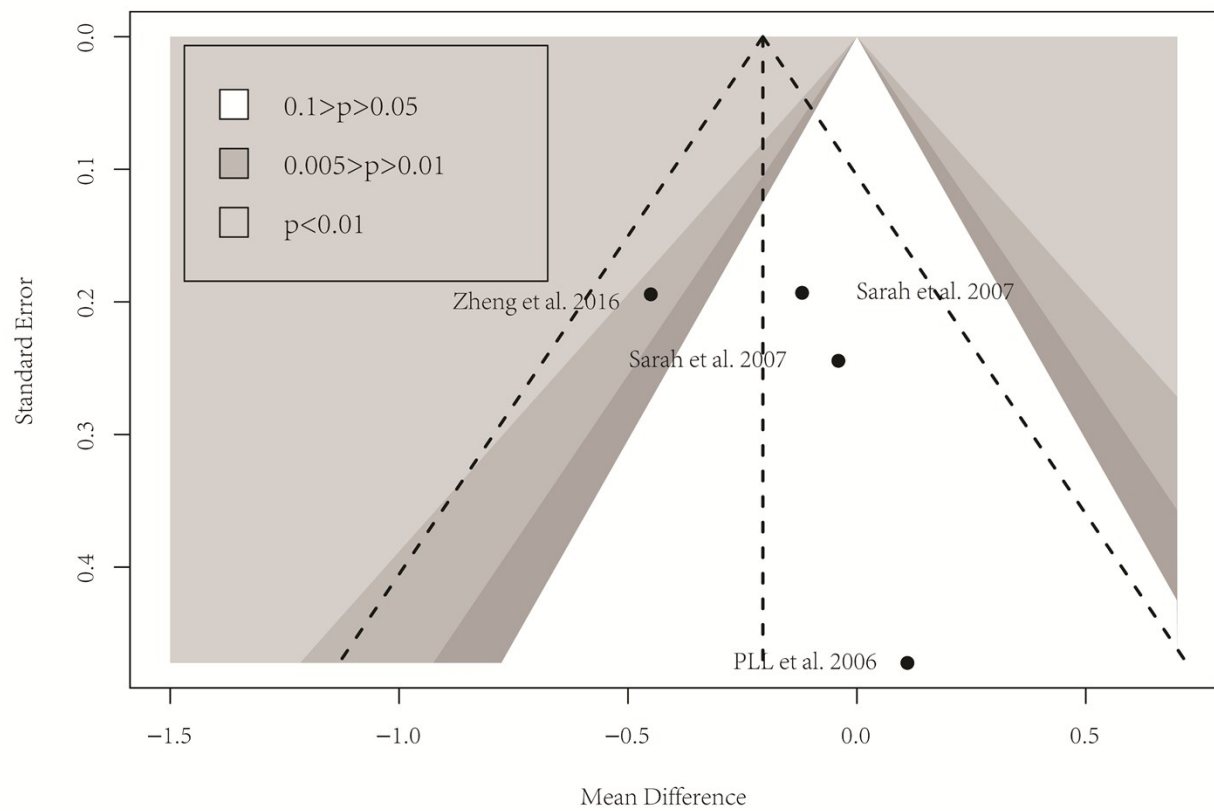

**Fig. S12 Contour-enhanced funnel plots with pseudo 95% confidence limits for publication bias on TC: HDL. TC, total cholesterol; HDL, high-density lipoprotein.**

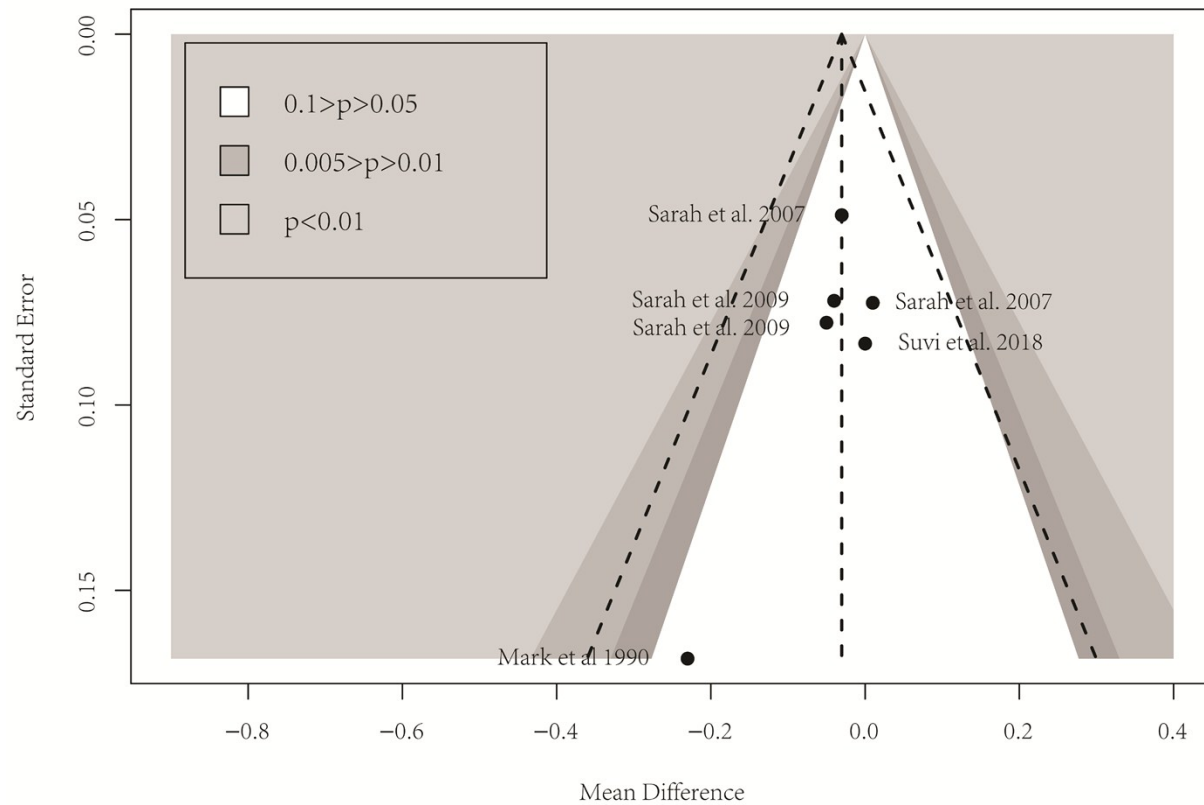

**Fig. S13 Contour-enhanced funnel plots with pseudo 95% confidence limits for publication bias on VLDL. VLDL, very low-density lipoproteins.**

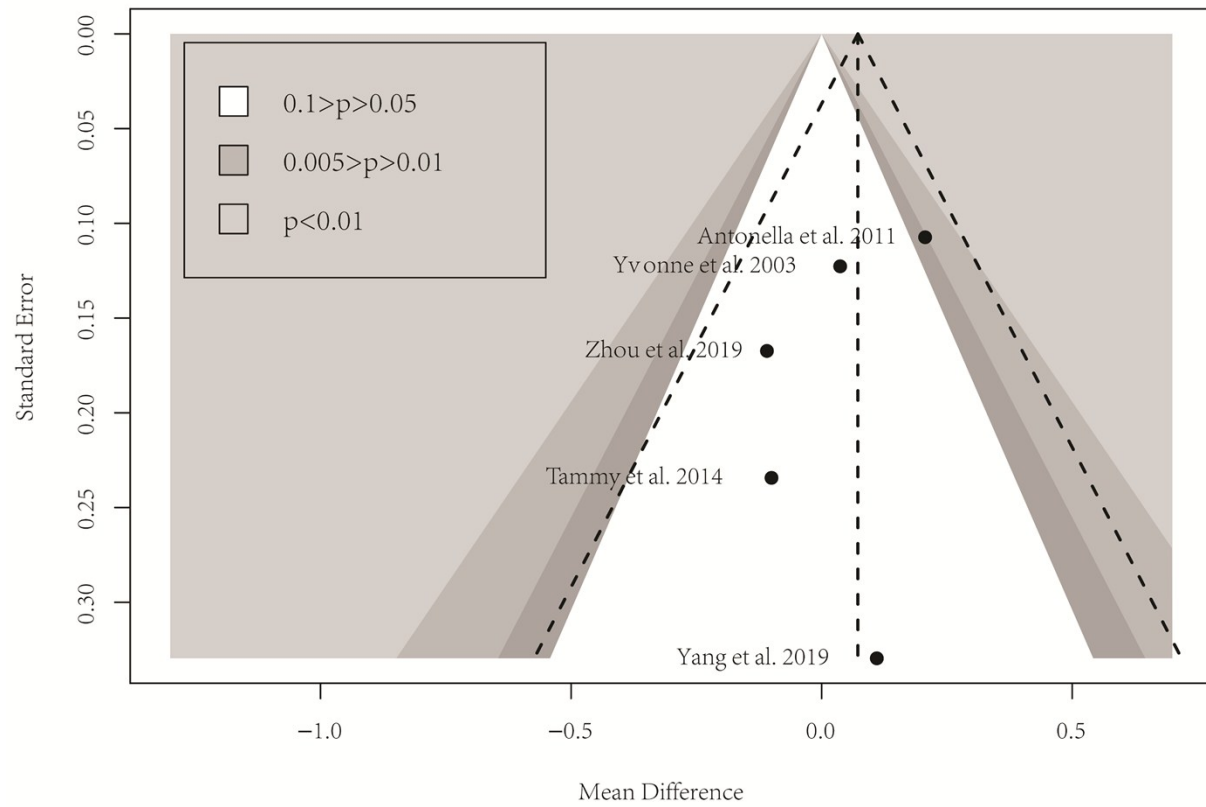

**Fig. S14 Contour-enhanced funnel plots with pseudo 95% confidence limits for publication bias on glucose.**

|                | Random sequence generation (selection bias) | Allocation concealment (selection bias) | Blinding of participants and personnel (performance bias) | Blinding of outcome assessment (detection bias) | Incomplete outcome data (attrition bias) | Selective reporting (reporting bias) | Other bias |
|----------------|---------------------------------------------|-----------------------------------------|-----------------------------------------------------------|-------------------------------------------------|------------------------------------------|--------------------------------------|------------|
| Antonella 2011 | ?                                           | ?                                       | ?                                                         | +                                               | +                                        | +                                    | +          |
| Leanne 2018    | ?                                           | ?                                       | ?                                                         | +                                               | ?                                        | +                                    | +          |
| Manja 2014     | ?                                           | ?                                       | +                                                         | +                                               | +                                        | +                                    | +          |
| Mark 1990      | ?                                           | ?                                       | ?                                                         | +                                               | +                                        | +                                    | +          |
| Nelson 2011    | ?                                           | ?                                       | +                                                         | +                                               | +                                        | +                                    | +          |
| PLL 2006       | ?                                           | ?                                       | ?                                                         | +                                               | +                                        | +                                    | +          |
| Sarah 2007     | +                                           | +                                       | ?                                                         | +                                               | +                                        | +                                    | +          |
| Sarah 2009     | +                                           | ?                                       | ?                                                         | +                                               | +                                        | +                                    | +          |
| Suvi 2018      | ?                                           | -                                       | -                                                         | +                                               | +                                        | +                                    | ?          |
| Tammy 2014     | ?                                           | +                                       | ?                                                         | +                                               | +                                        | +                                    | +          |
| Yang 2019      | +                                           | +                                       | +                                                         | +                                               | +                                        | +                                    | +          |
| Yvonne 2003    | ?                                           | ?                                       | +                                                         | +                                               | +                                        | +                                    | +          |
| Zheng 2016     | +                                           | +                                       | +                                                         | +                                               | +                                        | +                                    | +          |
| Zhou 2019      | +                                           | +                                       | +                                                         | +                                               | +                                        | +                                    | +          |

**Fig. S15 Risk of bias summary: each risk of bias item for each included study.**

**Table S1 Pooled estimates for EPA/DHA v. ALA supplementation on cardiometabolic indicators assuming correlation coefficients were obtained from baseline and end of study data provided by Zhou, PLL and Mark**

| Outcomes | No.trials | WMD    | 95% CI         | <i>P</i> | <i>I</i> <sup>2</sup> (%) |
|----------|-----------|--------|----------------|----------|---------------------------|
| TC       | 15        | 0.163  | 0.018, 0.307   | 0.027    | 73.2                      |
| LDL      | 16        | 0.271  | 0.023, 0.518   | 0.032    | 90.1                      |
| HDL      | 15        | 0.036  | 0.003, 0.070   | 0.034    | 42.5                      |
| VLDL     | 6         | -0.028 | -0.066, 0.010  | 0.145    | 0                         |
| TG       | 14        | -0.204 | -0.272, -0.137 | < 0.001  | 30.3                      |
| TC/HDL   | 4         | -0.190 | -0.427, 0.046  | 0.115    | 81.3                      |
| Glucose  | 5         | 0.057  | -0.102, 0.215  | 0.482    | 0                         |

WMD: weighted mean difference; CI: confidential interval; ALA:  $\alpha$ -linolenic acid; EPA: eicosapentaenoic acid; DHA: docosahexaenoic acid; TG: triglycerides; TC: total cholesterol; HDL: high-density lipoprotein; LDL: low-density lipoprotein; VLDL: very low-density lipoproteins.

*P* value is *P* for WMD.
